# Supplementary material
Source: PubMed Central journal article supplement (PMC3738834)
Supplement: mmc1.pdf [file mmc1.pdf]

## Supplemental Data

### Meta-analysis of Gene-Level Associations

#### for Rare Variants Based on Single-Variant Statistics

Yi-Juan Hu, Sonja I. Berndt, Stefan Gustafsson, Andrea Ganna, Genetic Investigation of ANthropometric Traits (GIANT) Consortium, Joel Hirschhorn, Kari E. North, Erik Ingelsson, and Dan-Yu Lin

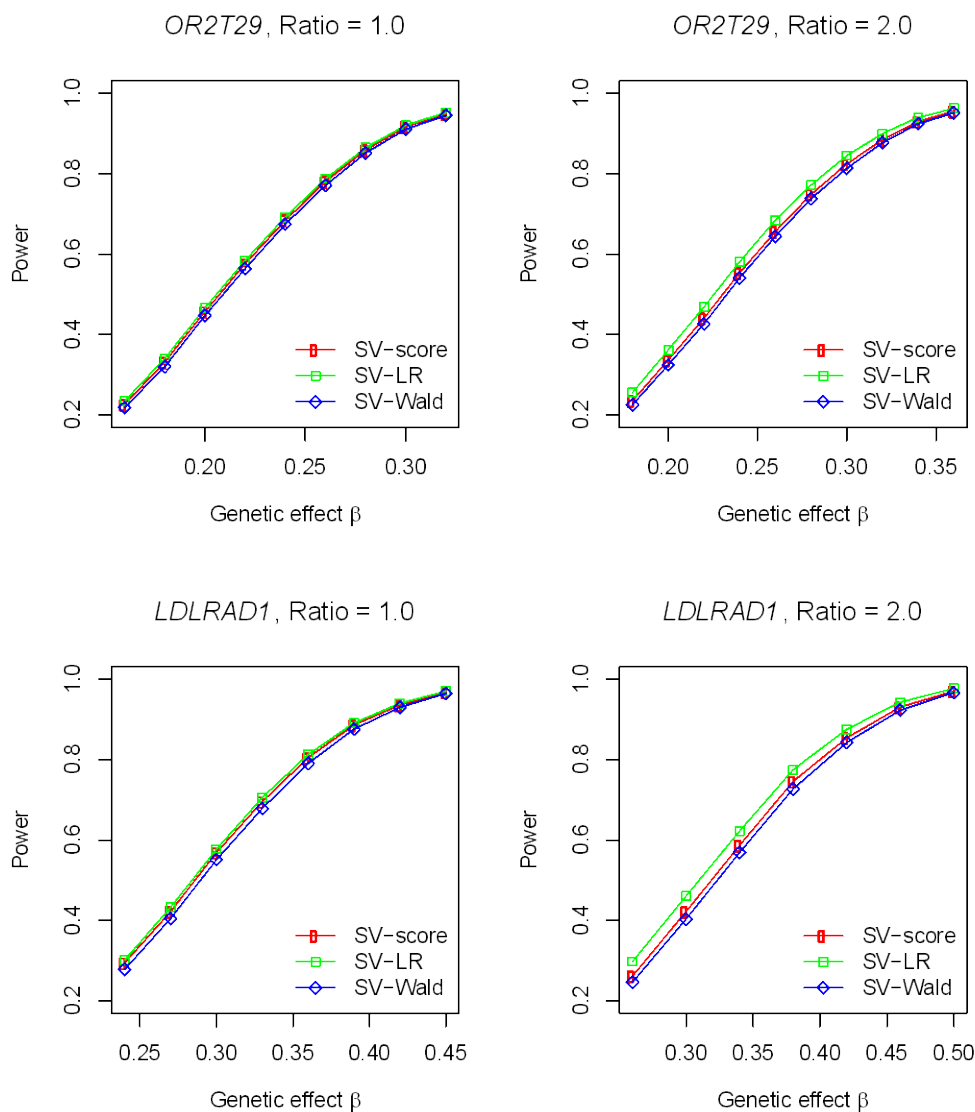

**Figure S1. Power of T5 at the nominal significance level  $\alpha$  of 0.001 for binary traits with an internal reference. Ratio is the case-control ratio for Study 2 and Study 3. SV-score, SV-LR and SV-Wald mean that single-variant  $p$ -values are based on the score, LR and Wald tests, respectively. Each power estimate is based on 10,000 replicates.**

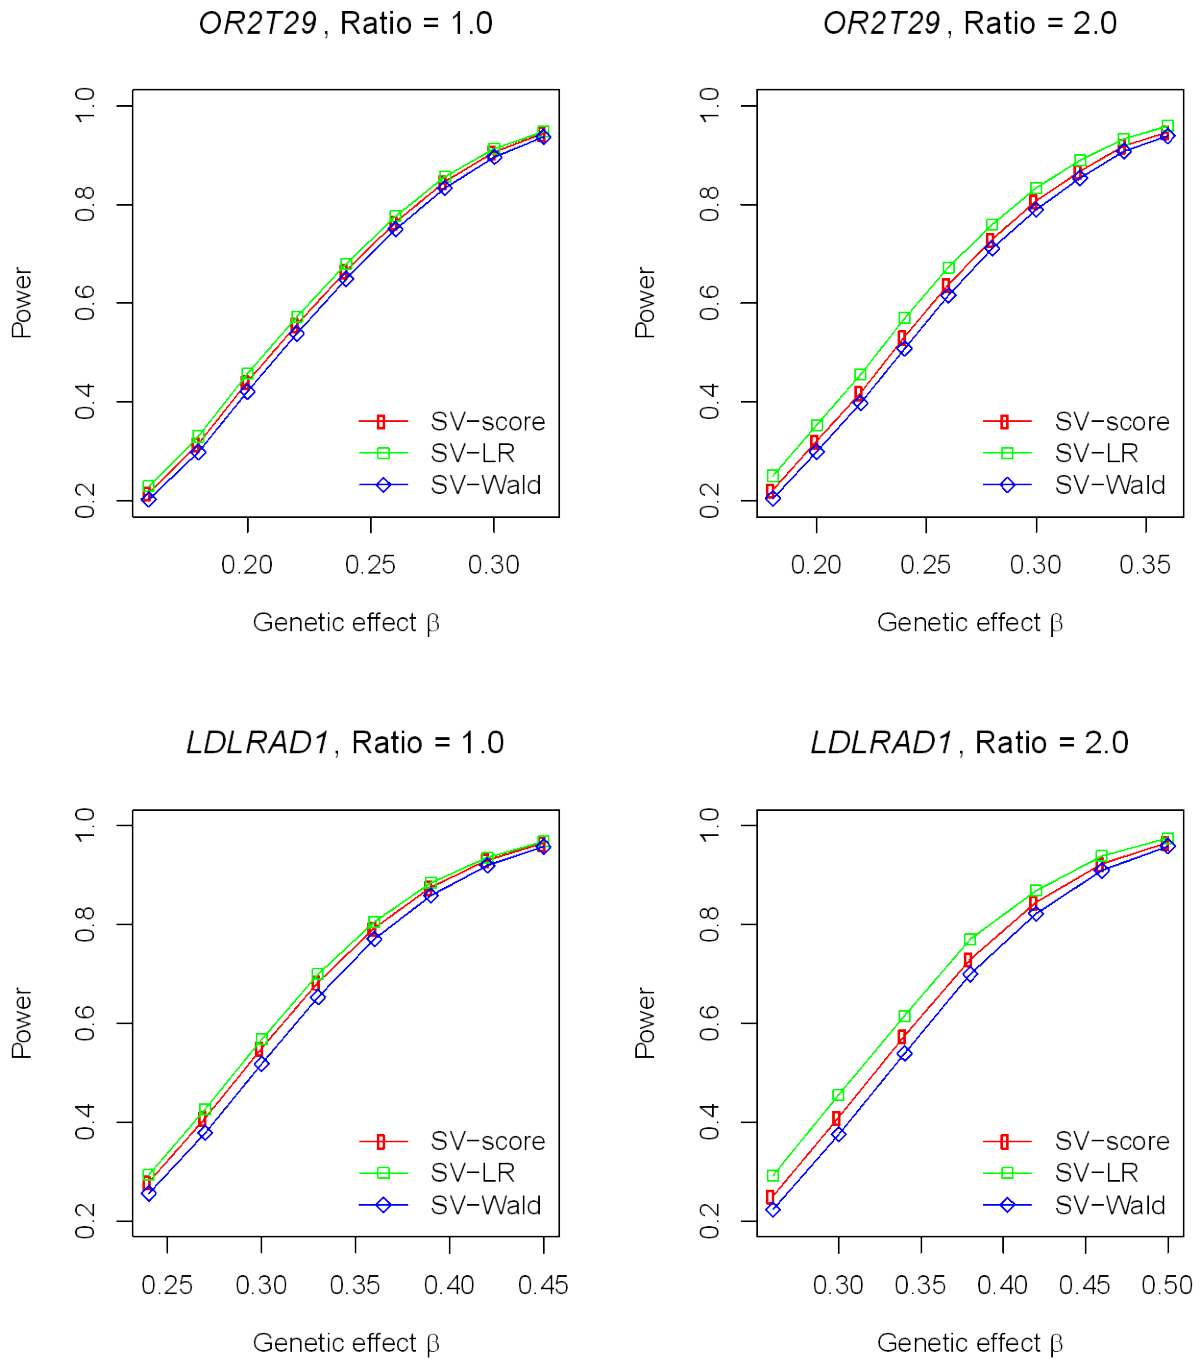

**Figure S2. Power of T5 at the nominal significance level  $\alpha$  of 0.001 for binary traits with an external reference. Ratio is the case-control ratio for Study 2 and Study 3. SV-score, SV-LR and SV-Wald mean that single-variant  $p$ -values are based on the score, LR and Wald tests, respectively. Each power estimate is based on 10,000 replicates.**

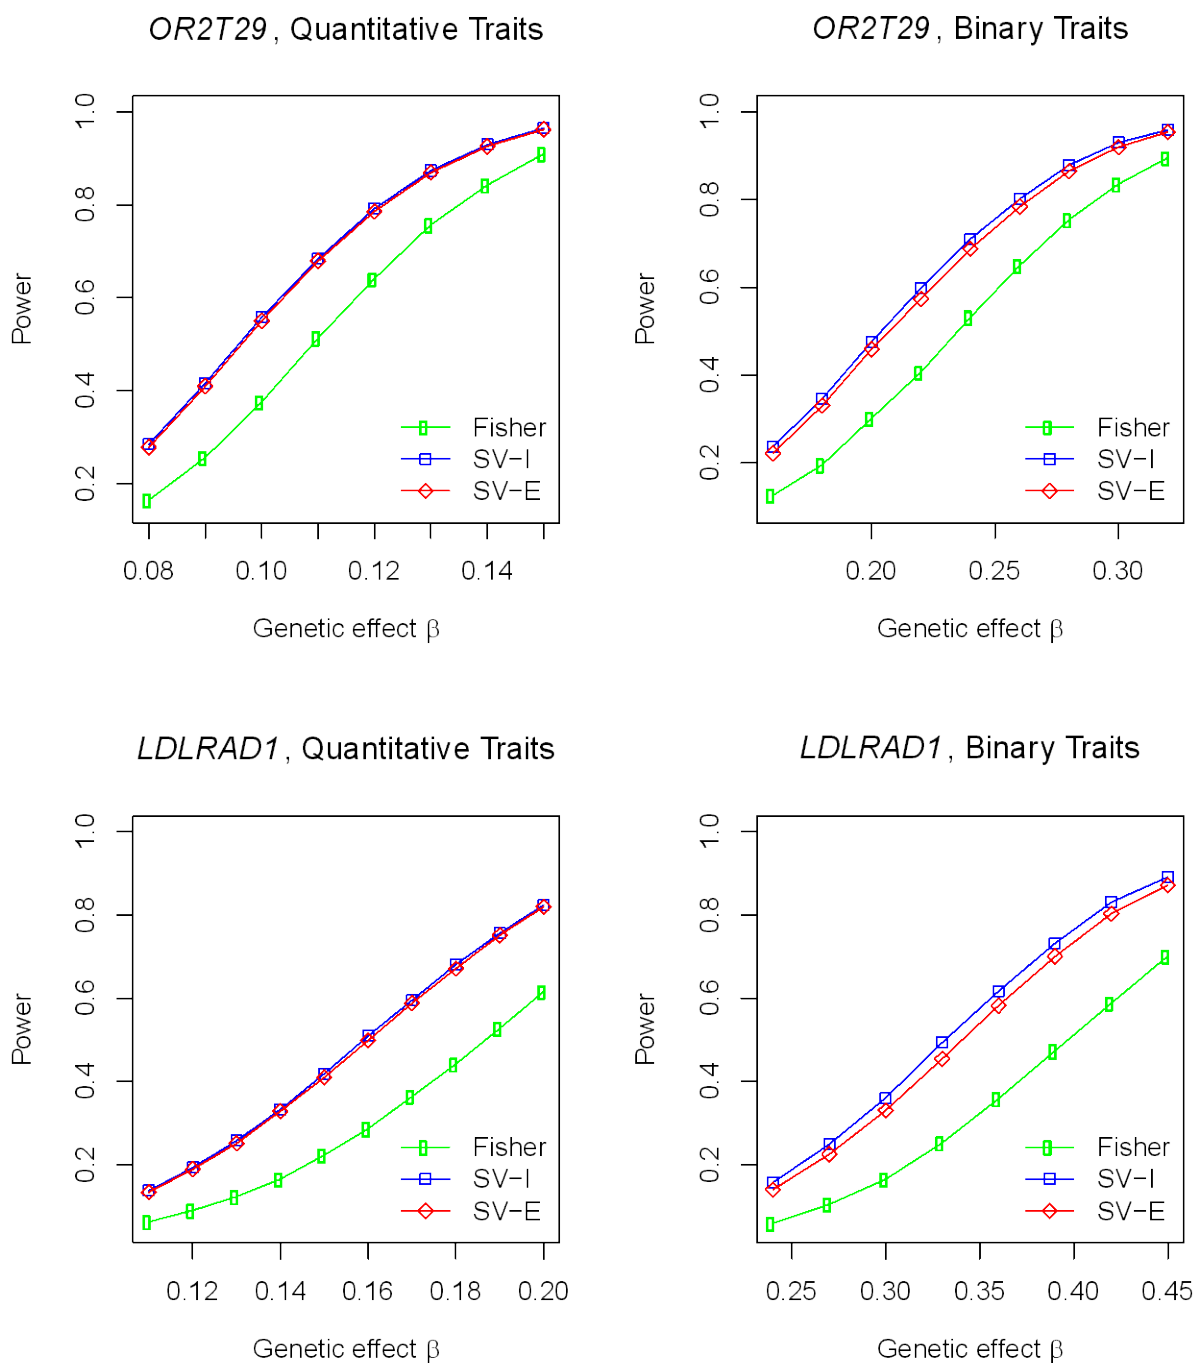

**Figure S3. Power of SKAT for the proposed and Fisher's methods at the nominal significance level  $\alpha$  of 0.001. For quantitative traits, the error variances in Study 2 and Study 3 are 1. For binary traits, the case-control ratios in Study 2 and Study 3 are 1. For SV-I and SV-E, single-variant  $p$ -values are based on the score test. Each power estimate is based on 10,000 replicates.**

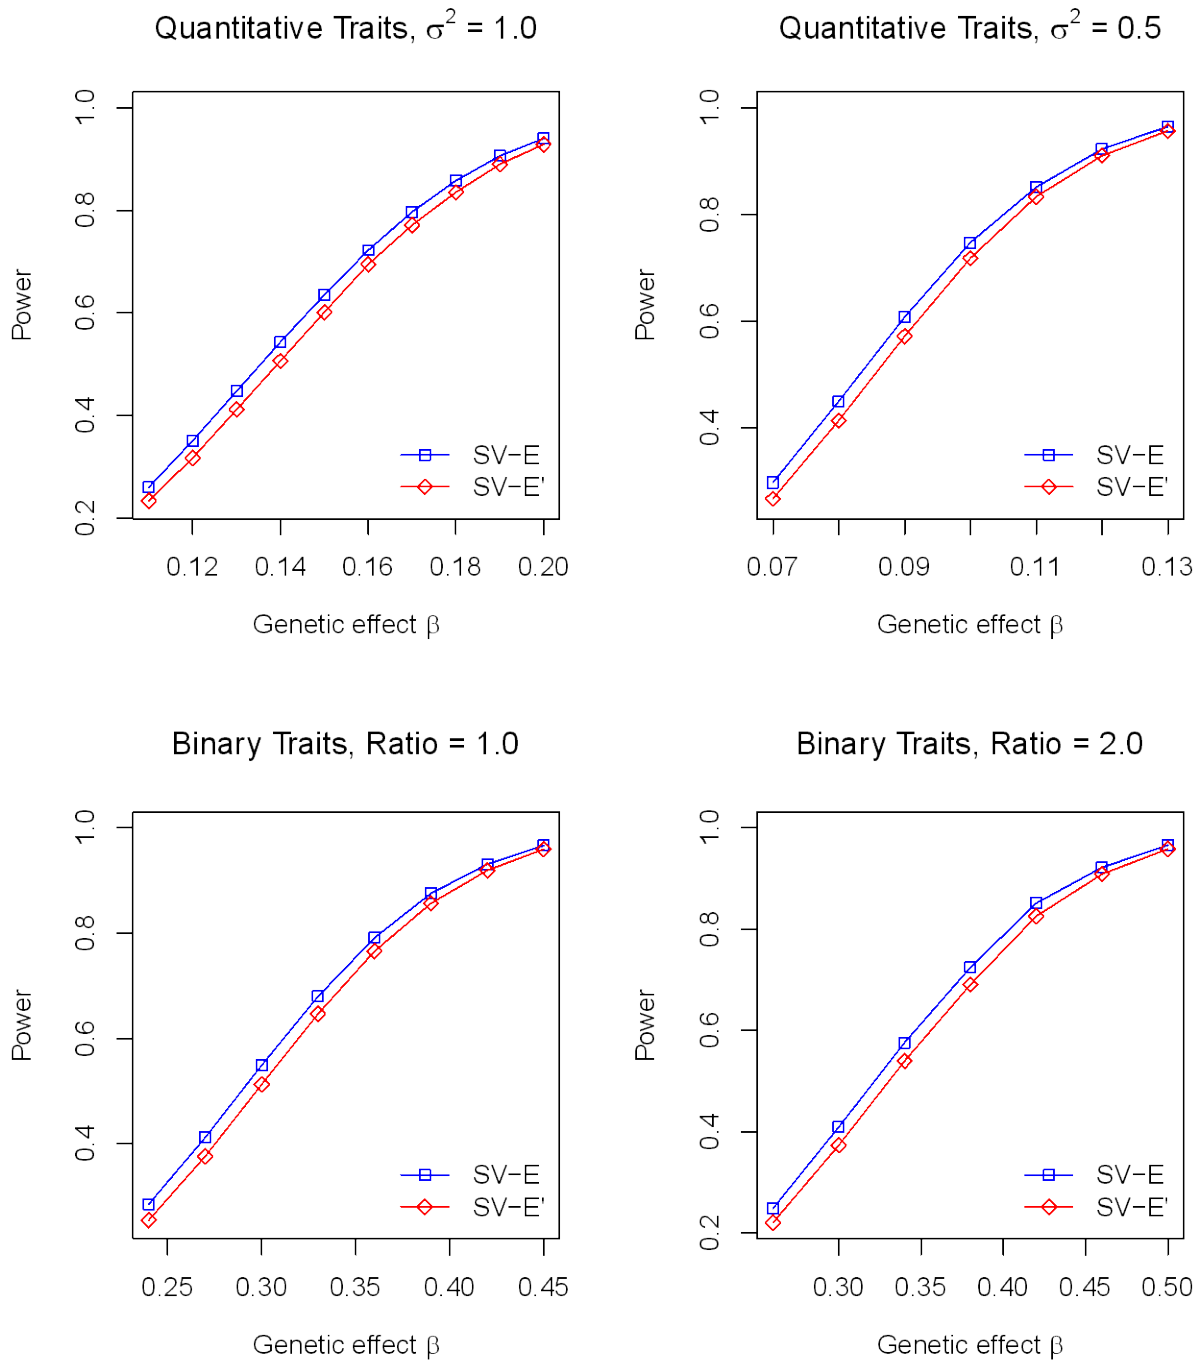

**Figure S4. Power of T5 for *LDLRAD1* at the nominal significance level  $\alpha$  of 0.001: SV-E and SV-E' pertain to correct and incorrect specifications of the external panel. For quantitative traits,  $\sigma^2$  is the error variance of Study 2 and Study 3. For binary traits, "Ratio" is the case-control ratio of Study 2 and Study 3. Single-variant  $p$ -values are based on the score test. Each power estimate is based on 10,000 replicates.**

**Table S1. Type I error (divided by the nominal significance level) for quantitative traits**

| Gene           | Test | $\sigma^2$ | SV-I  |      | SV-E  |      | naive |       |
|----------------|------|------------|-------|------|-------|------|-------|-------|
|                |      |            | score | LR   | score | LR   | score | LR    |
| <i>OR2T29</i>  | T5   | 0.5        | 0.98  | 0.99 | 0.96  | 0.97 | 75.67 | 75.90 |
|                |      | 1.0        | 1.00  | 1.01 | 0.97  | 0.98 | 75.54 | 75.77 |
|                | VT   | 0.5        | 1.00  | 1.01 | 0.97  | 0.98 | 53.53 | 53.75 |
|                |      | 1.0        | 1.00  | 1.00 | 1.01  | 1.02 | 53.34 | 53.53 |
|                | SKAT | 0.5        | 0.95  | 0.97 | 0.94  | 0.96 | 19.19 | 19.33 |
|                |      | 1.0        | 1.01  | 1.01 | 0.98  | 1.00 | 19.13 | 19.24 |
| <i>LDLRAD1</i> | T5   | 0.5        | 0.98  | 0.99 | 0.97  | 0.98 | 2.87  | 2.90  |
|                |      | 1.0        | 0.98  | 0.98 | 0.97  | 0.98 | 2.81  | 2.85  |
|                | VT   | 0.5        | 1.04  | 1.04 | 1.02  | 1.03 | 2.92  | 2.95  |
|                |      | 1.0        | 1.05  | 1.06 | 1.01  | 1.02 | 2.98  | 3.00  |
|                | SKAT | 0.5        | 1.02  | 1.03 | 1.01  | 1.03 | 2.39  | 2.44  |
|                |      | 1.0        | 1.00  | 1.01 | 1.03  | 1.05 | 2.38  | 2.41  |

Note: The summary statistics do not include the standard error estimates. The nominal significance level  $\alpha = 0.001$ .  $\sigma^2$  pertains to the error variance in Study 2 and Study 3. Each entry is based on 1,000,000 replicates.

**Table S2. Type I error (divided by the nominal significance level) for binary traits**

| Gene           | Test | Ratio | SV-I  |      | SV-E  |      | naive |       |
|----------------|------|-------|-------|------|-------|------|-------|-------|
|                |      |       | score | LR   | score | LR   | score | LR    |
| <i>OR2T29</i>  | T5   | 1.0   | 0.88  | 0.94 | 0.86  | 0.92 | 73.13 | 74.75 |
|                |      | 2.0   | 0.99  | 1.00 | 0.93  | 0.97 | 73.60 | 73.93 |
|                | VT   | 1.0   | 0.89  | 0.95 | 0.83  | 0.92 | 51.10 | 52.54 |
|                |      | 2.0   | 1.02  | 1.01 | 0.98  | 0.98 | 51.91 | 52.14 |
|                | SKAT | 1.0   | 0.90  | 0.96 | 0.84  | 0.92 | 17.65 | 18.64 |
|                |      | 2.0   | 0.98  | 0.98 | 0.92  | 0.95 | 18.16 | 18.45 |
| <i>LDLRAD1</i> | T5   | 1.0   | 0.83  | 0.89 | 0.76  | 0.86 | 2.18  | 2.46  |
|                |      | 2.0   | 1.06  | 1.00 | 0.99  | 0.96 | 3.12  | 2.81  |
|                | VT   | 1.0   | 0.76  | 0.85 | 0.64  | 0.77 | 2.04  | 2.46  |
|                |      | 2.0   | 1.07  | 0.98 | 0.88  | 0.83 | 3.20  | 2.82  |
|                | SKAT | 1.0   | 0.83  | 0.96 | 0.70  | 0.85 | 1.58  | 1.92  |
|                |      | 2.0   | 0.93  | 0.94 | 0.75  | 0.82 | 1.95  | 1.98  |

Note: The summary statistics do not include the standard error estimates. The nominal significance level  $\alpha = 0.001$ . Ratio is the case-control ratio in Study 2 and Study 3. Each entry is based on 1,000,000 replicates.

**Table S3. Correlation matrix of the *LDLRADI* genotypes in ESP HeartGO data**

|             | rs143619888 | rs150468103 | rs141759859 | rs149768061 | rs147345740 | rs145889899 | rs142900519 | rs149114405 |
|-------------|-------------|-------------|-------------|-------------|-------------|-------------|-------------|-------------|
| rs143619888 | 1           | 0           | 0.003       | 0.014       | 0           | 0.011       | 0           | 0           |
| rs150468103 |             | 1           | 0           | 0           | 0           | 0           | 0           | 0           |
| rs141759859 |             |             | 1           | 0.004       | 0           | 0.003       | 0.001       | 0           |
| rs149768061 |             |             |             | 1           | 0           | 0.780       | 0.004       | 0           |
| rs147345740 |             |             |             |             | 1           | 0           | 0           | 0           |
| rs145889899 |             |             |             |             |             | 1           | 0.003       | 0           |
| rs142900519 |             |             |             |             |             |             | 1           | 0           |
| rs149114405 |             |             |             |             |             |             |             | 1           |

**Table S4. Type I error (divided by the nominal significance level) of SV-E' for testing *LDLRADI***

| Test | Quantitative traits |       |      |      | Binary traits |       |      |      |
|------|---------------------|-------|------|------|---------------|-------|------|------|
|      | $\sigma^2$          | score | LR   | Wald | Ratio         | score | LR   | Wald |
| T5   | 1.0                 | 0.74  | 0.74 | 0.75 | 1.0           | 0.52  | 0.60 | 0.39 |
|      | 0.5                 | 0.72  | 0.72 | 0.74 | 2.0           | 0.64  | 0.63 | 0.50 |
| VT   | 1.0                 | 0.90  | 0.91 | 0.92 | 1.0           | 0.48  | 0.57 | 0.32 |
|      | 0.5                 | 0.89  | 0.90 | 0.90 | 2.0           | 0.71  | 0.67 | 0.48 |
| SKAT | 1.0                 | 0.90  | 0.91 | 0.92 | 1.0           | 0.64  | 0.74 | 0.46 |
|      | 0.5                 | 0.89  | 0.90 | 0.91 | 2.0           | 0.60  | 0.68 | 0.45 |

Note: The nominal significance level  $\alpha = 0.001$ . For quantitative traits,  $\sigma^2$  is the error variance of Study 2 and Study 3. For binary traits, "Ratio" is the case-control ratio of Study 2 and Study 3. Each entry is based on 1,000,000 replicates.
